# Supplementary material for: 精神障害と作業療法と化粧--"おしゃれクラブ"の紹介を通して (特集 見た目を大切にする作業療法)
Source: Royal Society of Chemistry journal article supplement (doi:10.1039/d3fo00566f), 2009-01-01
Supplement: d3fo00566f1.pdf [file d3fo00566f1.pdf]

**Table 1** Summary of different delivery carriers for phytosterols

| Carrier       | Formulation components                                                                                       | Major findings                                                                                                                                                                                                                       | Reference                      |
|---------------|--------------------------------------------------------------------------------------------------------------|--------------------------------------------------------------------------------------------------------------------------------------------------------------------------------------------------------------------------------------|--------------------------------|
| Nanoemulsion  | $\beta$ -sitosterol, catechin, polyunsaturated lipid                                                         | After emulsified, the melting points and crystallinity of $\beta$ -sitosterol were reduced                                                                                                                                           | (Wang et al., 2019)            |
| Nanoemulsion  | Phytosterol lecithin, monoacyl glycerol, soy lecithin, bulk milk fat                                         | The decreasing in droplet size plays a great impact on lowering crystallization of PS and improving physicochemical stability of emulsion                                                                                            | (Zychowski et al., 2018)       |
| Nanoemulsion  | Phytosterol, whey protein, bulk milk fat                                                                     | Phytosterols at lower concentrations (0.3 wt%) worked together whey protein to reduce effectively interfacial tension.                                                                                                               | (Zychowski et al., 2016)       |
| Nanoemulsion  | Echium oil, phytosterol esters, phenolic compounds, Tween 20                                                 | Sinapic acid and rutin showed the highest antioxidant action for phytosterols in emulsion.                                                                                                                                           | (Espinosa et al., 2015)        |
| Microemulsion | Phytosterols, simvastatin sucrose monolaurate, propylene glycol, and oleyl lactate                           | This microemulsion elevated the dissolution for PSs in the water-free system                                                                                                                                                         | (Fisher et al., 2013)          |
| Microemulsion | Ergosterol, Tween 80, Cremophor EL, Cremophor RH40, PEG400, ethanol                                          | In the microemulsions, the water dispersibility of PSs in microemulsions was 1000 times higher than that of free PSs in water and the oral bioavailability of PSs was increased 2.56-fold and 4.5-fold than their unemulsified form. | (Yi et al., 2012)              |
| Microemulsion | $\beta$ -Sitosterol ester, $\beta$ -sitosterol, linoleic acid                                                | Beta-sitosterol self-micro emulsion showed a higher lipid-lowering effect than the $\beta$ -sitosterol powder and tablets.                                                                                                           | (Yuan et al., 2019)            |
| Microemulsion | Sitosterol, oryzanol, medium-chain triglycerides, tween 20                                                   | The emulsions had a good stability and high encapsulation efficiency of more than 80% for 30 days storage period                                                                                                                     | (Khalid et al., 2017)          |
| Microemulsion | Phytosterols, lemon essential oil, polyoxyethylene hydrogenated castor oil, Tween60, polyethylene glycol 400 | Microemulsion showed encapsulation efficiency of 89.65% and increased the bioavailability of phytosterols more than three times                                                                                                      | (Chuanxun et al., 2019)        |
| oleogel       | Phytosterols, oryzanol, sunflower oil                                                                        | It showed good textural and rheological properties that employed as an alternative of the pig backfat successfully                                                                                                                   | (Panagiotopoulou et al., 2016) |
| oleogel       | Phytosterols, glycerol monostearate, lecithin, liquid coconut oil                                            | phytosterol-based oleogels containing glycerol monostearate show a substantially higher flow consistency index than that with lecithin did                                                                                           | (Li et al., 2022)              |
| oleogel       | $\beta$ -sitosterol, $\gamma$ -oryzanol,                                                                     | chocolate with $\beta$ -sitosterol/ $\gamma$ -oryzanol                                                                                                                                                                               | (Sun et al., 2021)             |

|          |                                                                                               |                                                                                                                                                                                                                                                                     |                            |
|----------|-----------------------------------------------------------------------------------------------|---------------------------------------------------------------------------------------------------------------------------------------------------------------------------------------------------------------------------------------------------------------------|----------------------------|
|          | stearic acid, lecithin, corn oil                                                              | oleogel display the strongest gel-forming capacity, the densest gel crystallization network, and similar sensory properties of dark chocolate                                                                                                                       |                            |
| Liposome | $\beta$ -sitosterol, stigmasterol, ergosterol and lanosterol, lecithin, insulin               | Liposomes ergosterol have better capacity in maintaining stability in simulated gastrointestinal fluid than liposomes prepared with cholesterol                                                                                                                     | (Cui et al., 2015)         |
| Liposome | $\beta$ -sitosterol, stigmasterol, campesterol, soybean lecithin, ascorbic acid, cholesterol  | The presence of phytosterols affected the liposome stability and encapsulation efficiency of liposome.                                                                                                                                                              | (Alexander et al., 2012)   |
| Liposome | $\beta$ -Sitosterol, lecithin, curcumin                                                       | The stability, encapsulation effectiveness, were greatly enhanced with the content of $\beta$ -sitosterol was raised from 20 to 33 %<br>Liposome with soy phospholipids, which can encapsulate 35% of PSs. PSs at relatively lower concentration preferentially co- | (Tai et al., 2019)         |
| Liposome | Phytosterol, phytosterol esters, soybean lecithin                                             | assemble into phospholipid bilayers without the formation of crystals. With the contents of PSs increase at the saturation in system, PSs can be incorporated into the lumen of liposomes and possibly form small crystals.                                         | (Wang et al., 2017)        |
| NLC      | $\beta$ -sitosterol, green tea extract, grapeseed oil, fish oil, squalene, Tween 20, Tween 80 | The NLCs showed higher antioxidant capacity up to 92% as compared to the free $\beta$ -sitosterol (36.5%).                                                                                                                                                          | (Lacatusu et al., 2012)    |
| SLN      | Cmonostearate glycerol, distearate glycerol, tristearate, lecithin                            | PS-GMS acquired the highest bioaccessibility due to their sensitivity to the intestinal hydrolysis. An increase in the number of acyl chains of glycerides change their spatial arrangement and inhibits the hydrolysis of ester bonds by enzymes                   | (Guo et al., 2022)         |
| NLC      | $\beta$ -sitosterol, propolis wax, glyceryl behenate, pomegranate seed oil, Tween 80          | NLC with relatively good physical and chemical stability and ensured the delivery of $\beta$ -sitosterol to various food Less oil in their formulation may result in larger size and lower encapsulation efficiency.                                                | (Soleimanian et al., 2018) |
| NLC      | $\beta$ -sitosterol, Precirol, Miglyol, PEG aqueous phase Poloxamer 407                       | NLCs with optimal formulation displayed encapsulation efficiency of 99.96%, uniform size distribution and increased antioxidant capacity<br>The stability of NLCs in butter preserved no change during the 3-month storage.                                         | (Bagherpour et al., 2017)  |

|                                                   |                                                                                                                  |                                                                                                                                                                                                |                                 |
|---------------------------------------------------|------------------------------------------------------------------------------------------------------------------|------------------------------------------------------------------------------------------------------------------------------------------------------------------------------------------------|---------------------------------|
| NLC                                               | Phytosterols, fully hydrogenated soybean oil, and soybean oil, soybean lecithin, ethoxylated sorbitan monooleate | The nanoparticles in aqueous dispersion have lower temperatures for crystallization and presented higher thermal resistance.                                                                   | (da Silva Santos et al., 2019)  |
| NLC                                               | $\beta$ -sitosterol, beeswax, pomegranate seed oil, Tween 80 and phospholipids                                   | $\beta$ -sitosterol loading in NLCs exhibited increased solubility and gradual release and reduced total cholesterol and mouse plasma LDL-cholesterol levels                                   | (Soleimanian et al., 2020)      |
| Protein-based nanoparticles                       | Phytosterol powder, Whey protein concentrate, soy protein isolate and sodium caseinate                           | Protein-based nanoparticles exhibited smaller particle sizes, higher packaging efficiency and loading capacity, better water redispersion and lower crystallinity of PS among them.            | (Cao et al., 2016)              |
| Protein-based nanoparticles                       | Stigmasterol, zein and organic solvents                                                                          | The nanoparticles were produced with homogenous size, smooth surface, high encapsulation efficiency (97%) and stability                                                                        | (Feng et al., 2019)             |
| Carbohydrate-based nanoparticles                  | Phytosterol, Nanoporous starch aerogels (NSA) supercritical CO <sub>2</sub>                                      | The PS-NSA decrease the crystallinity and improve the water solubility and acquired a 20-fold higher bioaccessibility than the crude PSs                                                       | (Ubeyitogullari et al., 2017)   |
| Carbohydrate-based nanoparticles                  | Phytosterol, Nanoporous starch aerogels (NSA) supercritical CO <sub>2</sub>                                      | Allow preparation of low- and nonfat food enriched with phytosterol and increase their bioaccessibility from 16 to 53% in non-fat bars                                                         | (Ubeyitogullari & Ciftci, 2019) |
| Complex coacervation of biopolymers nanoparticles | Phytosterol, soy protein isolate, pectin                                                                         | Nanoparticles with 5:1 ratio of SPI/pectin exhibited higher encapsulation efficiency of 87.9% and better stability against gastric acid conditions                                             | (Feng et al., 2021)             |
| Complex coacervation of biopolymers nanoparticles | Beta-sitosterol and echium seed oil, gelatin, Arabic gum                                                         | Gelatin-Arabic gum nanoparticles showed encapsulation efficiency for $\alpha$ -linolenic, stearidonic acid, and $\beta$ -sitosterol of 96, 90, and 74%, respectively at 30 days storage period | (Comunian et al., 2018)         |
| Complex coacervation of biopolymers nanoparticles | Stigmasterol, zein and pectin                                                                                    | The loaded stigmasterols in nanoparticles can be delivered to the intestine successfully and release 99.07% of them                                                                            | (Feng et al., 2020)             |
| Complex coacervation of biopolymers nanoparticles | Phytosterol, sodium caseinate (SC), pectin                                                                       | The SC/pectin-based phytosterols NPs owning high encapsulation efficiency (91%). The bioaccessibility of PSs was increased by 43.8% comparing with SC-based NPs                                | (Gan et al., 2022)              |
| Complex coacervation of biopolymers nanoparticles | Ergosterol, whey protein isolate (WPI), chitosan                                                                 | WPI/chitosan nanoparticles with high yield and encapsulation efficiency by optimizing                                                                                                          | (Rudke et al., 2019)            |

- Alexander, M., Lopez, A. A., Fang, Y., & Corredig, M. (2012). Incorporation of phytosterols in soy phospholipids nanoliposomes: Encapsulation efficiency and stability. *Lwt*, *47*(2), 427-436.
- Bagherpour, S., Alizadeh, A., Ghanbarzadeh, S., Mohammadi, M., & Hamishehkar, H. (2017). Preparation and characterization of Betasitosterol-loaded nanostructured lipid carriers for butter enrichment. *Food bioscience*, *20*, 51-55.
- Cao, W.-J., Ou, S.-Y., Lin, W.-F., & Tang, C.-H. (2016). Food protein-based phytosterol nanoparticles: fabrication and characterization. *Food & Function*, *7*(9), 3973-3980.
- Chuanxun, Y., Xueru, Z., & Risheng, J. (2019). Development and characterization of phytosterol nanoemulsions and self-microemulsifying drug delivery systems. *bioRxiv*, 585166.
- Comunian, T. A., Nogueira, M., Scolaro, B., Thomazini, M., Ferro-Furtado, R., de Castro, I. A., & Favaro-Trindade, C. S. (2018). Enhancing stability of echium seed oil and beta-sitosterol by their coencapsulation by complex coacervation using different combinations of wall materials and crosslinkers. *Food Chemistry*, *252*, 277-284.
- Cui, M., Wu, W., Hovgaard, L., Lu, Y., Chen, D., & Qi, J. (2015). Liposomes containing cholesterol analogues of botanical origin as drug delivery systems to enhance the oral absorption of insulin. *International journal of pharmaceutics*, *489*(1-2), 277-284.
- da Silva Santos, V., Miyasaki, E. K., Cardoso, L. P., Ribeiro, A. P. B., & Santana, M. H. A. (2019). Crystallization, polymorphism and stability of nanostructured lipid carriers developed with soybean oil, fully hydrogenated soybean oil and free phytosterols for food applications. *Journal of Nanotechnology Research*, *1*(1), 1-21.
- Espinosa, R. R., Inchingolo, R., Alencar, S. M., Rodriguez-Estrada, M. T., & Castro, I. A. (2015). Antioxidant activity of phenolic compounds added to a functional emulsion containing omega-3 fatty acids and plant sterol esters. *Food Chemistry*, *182*, 95-104.
- Feng, S., Wang, D., Gan, L., Shao, P., Jiang, L., & Sun, P. (2020). Preparation and characterization of zein/pectin-based phytosterol nanodispersions and kinetic study of phytosterol release during simulated digestion in vitro. *Lwt*, *128*, 109446.
- Feng, S., Yan, J., Wang, D., Jiang, L., Sun, P., Xiang, N., & Shao, P. (2021). Preparation and characterization of soybean protein isolate/pectin-based phytosterol nanodispersions and their stability in simulated digestion. *Food Research International*, *143*, 110237.
- Feng, S., Zheng, X., Luan, D., Shao, P., & Sun, P. (2019). Preparation and characterization of zein-based phytosterol nanodispersions fabricated by ultrasonic assistant anti-solvent precipitation. *Lwt*, *107*, 138-144.
- Fisher, S., Wachtel, E. J., Aserin, A., & Garti, N. (2013). Solubilization of simvastatin and phytosterols in a dilutable microemulsion system. *Colloids and Surfaces B: Biointerfaces*, *107*, 35-42. <https://doi.org/https://doi.org/10.1016/j.colsurfb.2013.01.036>
- Gan, C., Liu, Q., Zhang, Y., Shi, T., He, W.-S., & Jia, C. (2022). A novel phytosterols delivery system based on sodium caseinate-pectin soluble complexes: Improving stability and bioaccessibility. *Food Hydrocolloids*, *124*, 107295.
- Guo, S.-J., Ma, C.-G., Hu, Y.-Y., Bai, G., Song, Z.-J., & Cao, X.-Q. (2022). Solid lipid nanoparticles for phytosterols delivery: The acyl chain number of the glyceride matrix affects the arrangement,

- stability, and release. *Food Chemistry*, 133412.
- Khalid, N., Kobayashi, I., Neves, M. A., Uemura, K., Nakajima, M., & Nabetani, H. (2017). Encapsulation of  $\beta$ -sitosterol plus  $\gamma$ -oryzanol in O/W emulsions: Formulation characteristics and stability evaluation with microchannel emulsification. *Food and bioproducts processing*, 102, 222-232.
- Lacatusu, I., Badea, N., Stan, R., & Meghea, A. (2012). Novel bio-active lipid nanocarriers for the stabilization and sustained release of sitosterol. *Nanotechnology*, 23(45), 455702.
- Li, J., Zhai, J., Chang, C., Yang, Y., Drummond, C. J., & Conn, C. E. (2022). Protective effect of surfactant modified phytosterol oleogels on loaded curcumin. *J Sci Food Agric*. <https://doi.org/10.1002/jsfa.12122>
- Panagiotopoulou, E., Moschakis, T., & Katsanidis, E. (2016). Sunflower oil organogels and organogel-in-water emulsions (part II): Implementation in frankfurter sausages. *Lwt*, 73, 351-356.
- Rudke, A. R., Heleno, S. A., Fernandes, I. P., Prieto, M., Gonçalves, O. H., Rodrigues, A. E., Ferreira, I. C., & Barreiro, M. F. (2019). Microencapsulation of ergosterol and *Agaricus bisporus* L. extracts by complex coacervation using whey protein and chitosan: Optimization study using response surface methodology. *Lwt*, 103, 228-237.
- Soleimanian, Y., Goli, S. A. H., Varshosaz, J., Di Cesare Mannelli, L., Ghelardini, C., Cirri, M., & Maestrelli, F. (2020).  $\beta$ -Sitosterol Loaded Nanostructured Lipid Carrier: Physical and Oxidative Stability, In Vitro Simulated Digestion and Hypocholesterolemic Activity. *Pharmaceutics*, 12(4), 386. <https://www.mdpi.com/1999-4923/12/4/386>
- Soleimanian, Y., Goli, S. A. H., Varshosaz, J., & Maestrelli, F. (2018). Propolis wax nanostructured lipid carrier for delivery of  $\beta$  sitosterol: Effect of formulation variables on physicochemical properties. *Food Chemistry*, 260, 97-105.
- Sun, P., Xia, B., Ni, Z.-J., Wang, Y., Elam, E., Thakur, K., Ma, Y.-L., & Wei, Z.-J. (2021). Characterization of functional chocolate formulated using oleogels derived from  $\beta$ -sitosterol with  $\gamma$ -oryzanol/lecithin/stearic acid. *Food Chemistry*, 360, 130017.
- Tai, K., Rappolt, M., He, X., Wei, Y., Zhu, S., Zhang, J., Mao, L., Gao, Y., & Yuan, F. (2019). Effect of  $\beta$ -sitosterol on the curcumin-loaded liposomes: Vesicle characteristics, physicochemical stability, in vitro release and bioavailability. *Food Chemistry*, 293, 92-102.
- Ubeyitogullari, A., & Ciftci, O. N. (2019). In vitro bioaccessibility of novel low-crystallinity phytosterol nanoparticles in non-fat and regular-fat foods. *Food Research International*, 123, 27-35.
- Ubeyitogullari, A., Moreau, R., Rose, D. J., Zhang, J., & Ciftci, O. N. (2017). Enhancing the bioaccessibility of phytosterols using nanoporous corn and wheat starch bioaerogels. *European Journal of Lipid Science and Technology*, 121(1), 1700229.
- Wang, F. C., Acevedo, N., & Marangoni, A. G. (2017). Encapsulation of phytosterols and phytosterol esters in liposomes made with soy phospholipids by high pressure homogenization. *Food Funct*, 8(11), 3964-3969. <https://doi.org/10.1039/c7fo00905d>
- Wang, X., Li, X., Xu, D., Zhu, Y., Cao, Y., Wang, J., & Sun, B. (2019). Comparison of heteroaggregation, layer-by-layer and directly mixing techniques on the physical properties and in vitro digestion of emulsions. *Food Hydrocolloids*, 95, 228-237.
- Yi, C., Zhong, H., Tong, S., Cao, X., Firemong, C. K., Liu, H., Fu, M., Yang, Y., Feng, Y., & Zhang, H. (2012). Enhanced oral bioavailability of a sterol-loaded microemulsion formulation of Flammulina velutipes, a potential antitumor drug. *International journal of nanomedicine*, 7, 5067.

- Yuan, C., Zhang, X., Long, X., Jin, J., & Jin, R. (2019). Effect of beta-sitosterol self-microemulsion and beta-sitosterol ester with linoleic acid on lipid-lowering in hyperlipidemic mice. *Lipids Health Dis*, 18(1), 157. <https://doi.org/10.1186/s12944-019-1096-2>
- Zychowski, L. M., Logan, A., Augustin, M. A., Kelly, A. L., O'Mahony, J. A., Conn, C. E., & Auty, M. A. E. (2018). Phytosterol crystallisation within bulk and dispersed triacylglycerol matrices as influenced by oil droplet size and low molecular weight surfactant addition. *Food Chem*, 264, 24-33. <https://doi.org/10.1016/j.foodchem.2018.04.026>
- Zychowski, L. M., Logan, A., Augustin, M. A., Kelly, A. L., Zabara, A., O'Mahony, J. A., Conn, C. E., & Auty, M. A. (2016). Effect of phytosterols on the crystallization behavior of oil-in-water milk fat emulsions. *Journal of Agricultural and Food Chemistry*, 64(34), 6546-6554.
